# Supplementary material for: Clinical Outcomes and Cost-effectiveness of Continuous Positive Airway Pressure to Manage Obstructive Sleep Apnea in Patients With Type 2 Diabetes in the U.K.
Source: Oxford University Press journal article supplement (doi:10.2337/dc13-2539), 2014-04-05

SUPPLEMENTARY DATA

**Supplementary Table 1.** Sensitivity analyses.

| Scenario                                                                                                                                      | Base case value | Effect on the cost per QALY gained with CPAP treatment            |
|-----------------------------------------------------------------------------------------------------------------------------------------------|-----------------|-------------------------------------------------------------------|
| The difference in the number of GP visits between the CPAP-treated and control groups ranged from -4 visits to 4 per patient                  | -2.1 visits     | The cost per QALY gained with CPAP ranged from £14,960 to £16,550 |
| The difference in the number of outpatient visits between the CPAP-treated and control groups ranged from -2 to 2 per patient                 | -1.2 visits     | The cost per QALY gained with CPAP ranged from £14,940 to £16,930 |
| The difference in the number of day case attendances between the CPAP-treated and control groups ranged from 0 to 1 per patient               | 0.1 attendance  | The cost per QALY gained with CPAP ranged from £15,270 to £15,900 |
| The difference in the number of hospitalisations between the CPAP-treated and control groups ranged from 0 to 1.0 per patient                 | 0.5 admissions  | The cost per QALY gained with CPAP ranged from £11,820 to £18,850 |
| The difference in the number of accident and emergency attendances between the CPAP-treated and control groups ranged from 0 to 1 per patient | 0.6 attendances | The cost per QALY gained with CPAP ranged from £15,080 to £15,510 |
| The difference in the cash value of prescribed drugs between the CPAP-treated and control groups ranged from £750 to £2,400 per patient       | £1,574          | The cost per QALY gained with CPAP ranged from £12,280 to £18,390 |
| The difference in the number of QALYs between the CPAP-treated and control groups ranged from 0.1 to 0.5 QALYs per patient                    | 0.27 QALYs      | The cost per QALY gained with CPAP ranged from £41,410 to £8,280  |

SUPPLEMENTARY DATA

**Supplementary Figure 1.** Distribution of costs and QALYs generated by bootstrapping.

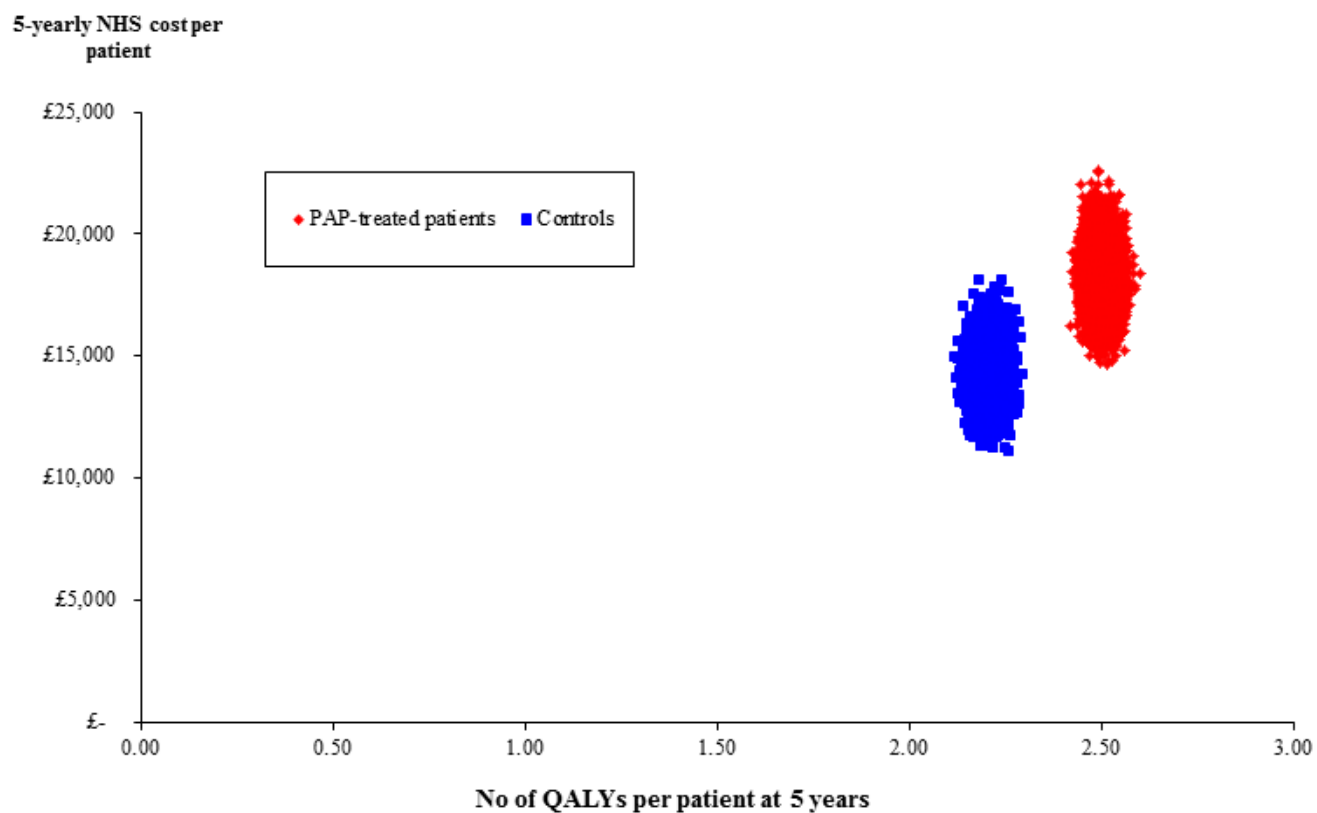

SUPPLEMENTARY DATA

**Supplementary Figure 2.** Cost-effectiveness acceptability curve.

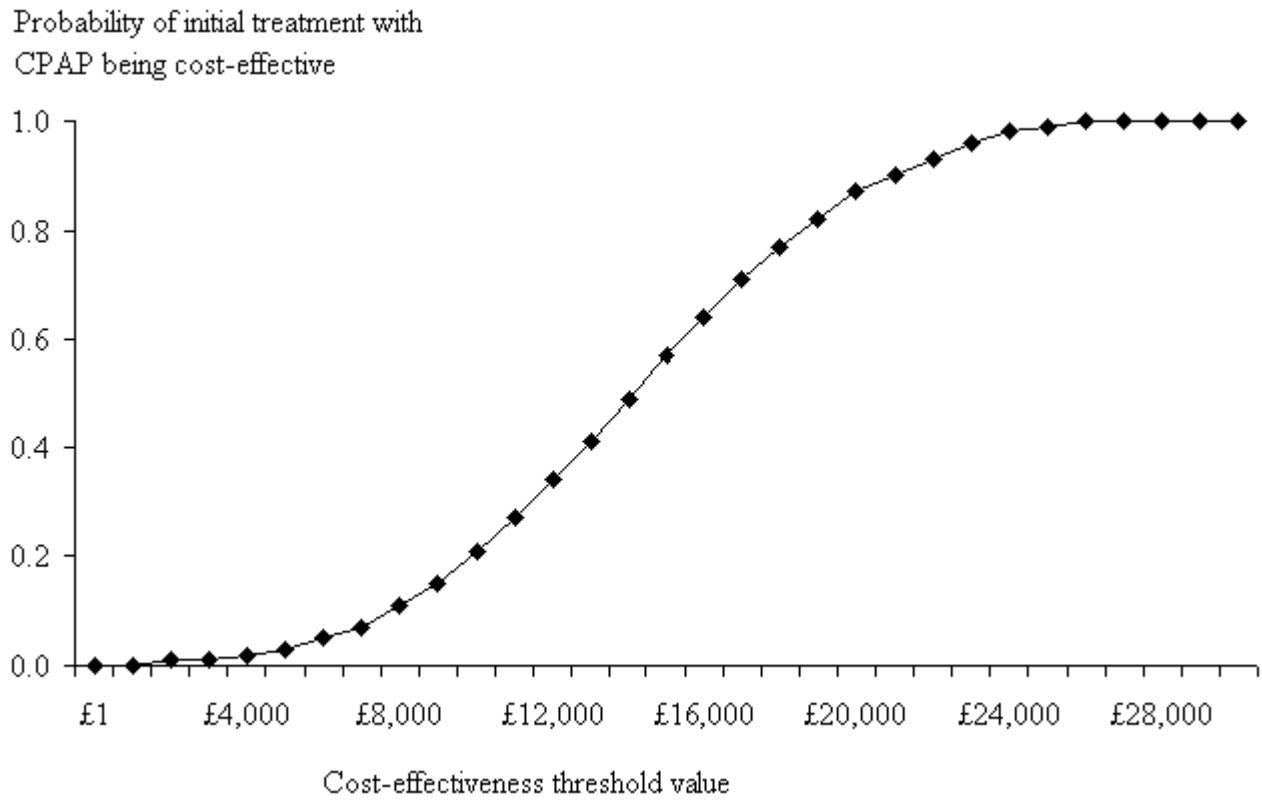

Supplement: dc132539supplementarydata.pdf [file dc132539supplementarydata.pdf]
